# Supplementary material for: Kinetic resolution of amino alcohol derivatives with a chiral nucleophilic catalyst: access to enantiopure cyclic cis-amino alcoholsElectronic supplementary information (ESI) available: experimental details. See http://www.rsc.org/suppdata/cc/b1/b108753c/
Source: Royal Society of Chemistry journal article supplement (doi:10.1039/b108753c), 2001-11-27
Supplement: b108753c.doc [file b108753c.doc]

Supplementary information

Kinetic resolution of amino alcohol derivatives with a chiral nucleophilic catalyst: An access to enantiopure cyclic *cis*-amino alcohols

Takeo Kawabata,* Kensaku Yamamoto, Yashima Momose, Hiroshi Yoshida,

Yoshie Nagaoka, and Kaoru Fuji

# Institute for Chemical Research, Kyoto University, Uji, Kyoto 611-0011, Japan

# E-mail: kawabata@scl.kyoto-u.ac.jp

***cis*-2-(*p*-Dimethylaminobenzoyl)aminocyclohexanol (2a)**

Triethylamine (2.90 mL, 20.8 mmol) was added to a solution of *cis*-2-aminocyclohexanol hydrochloride (2.10 g, 13.9 mmol), *p*-dimethylaminobenzotriazol* (3.10 g, 15.2 mmol), and 4-dimethylaminopyridine (168 mg, 1.4 mmol) in dichloromethane (40 mL) at 0 °C and the mixture was stirred at room temperature for 43 h. Precipitates were collected by filtration. The filtrate was washed with brine, dried over anhydrous Na2SO4, filtered, and concentrated *in vacuo*. The residue was purified by flash column chromatography (SiO2, ethyl acetate:hexane=1:1) to give white solids. The combined solid materials were recrystallized from EtOAc-*i*PrOH to give **2a** (3.03 g, 84 % yield).

***dl*-2a**: Colorless prisms; mp. 173 - 174 °C. 1H NMR (200 MHz) (CDCl3) δ1.35~1.90 (m, 8 H), 2.49 (br s, 1 H), 3.01 (s, 6 H), 3.96-4.21 (m, 2 H), 6.42 (br d, *J* = 7.9 Hz, 1 H), 6.67 (d, *J* = 8.9 Hz, 2 H), 7.69 (d, *J* = 8.9 Hz, 2 H). IR (CHCl3) 3343, 2927, 1609, 1544, 1508, 1444, 1336, 1200 1198 cm1. MS *m/z* (rel intensity) 262 (M+, 20), 244 (10), 164 (35) 148 (100). Anal. Calcd for C15H22N2O2: C, 68.67; H, 8.50; N, 10.68. Found: C, 68.37; H, 8.50; N, 10.48.

**(1*R*, 2*S*)-2a** **(>99% ee)**: [a]D21 =  22 (*c* 0.4, CHCl3).

* G. Cai, N. Bezhkova, J. Odingo, N. Berova, K. Nakanishi, *J. Am. Chem. Soc*., 1993, **115**, 7192.

***cis*-2-(*p*-Dimethylaminobenzoyl)aminocyclopentanol (3)**

***dl*-3**: Obtained from *cis*-2-aminocyclopentanol and *p*-dimethylamino-benzotriazol according to the procedure for **2a** in 35% yield. Colorless prisms (*i*PrOH); mp 170 - 171 ?. 1H NMR (200 MHz) (CDCl3) δ1.45~ 2.30 (m, 6 H), 2.34 (br s, 1 H), 3.01 (s, 6 H), 4.20~4.45 (m, 2 H), 6.45 (br d, *J* = 6.8 Hz, 1H), 6.67 (d, *J* = 8.9 Hz, 2 H), 7.70 (d, *J* = 8.9 Hz, 2 H). IR (CHCl3) 3446, 3018, 1636, 1608, 1499, 1364, 1221 cm1. MS *m/z* (rel intensity) 248 (M+, 25), 165 (23), 148 (100). Anal. Calcd for C14H20N2O2: C, 67.71; H, 8.12; N, 11.28. Found: C, 67.55; H8.24; N, 11.11.

**(1*R*, 2*S*)-3** **(>99% ee)**: [a]D18 =  1.9 (*c* 1.0, CHCl3).

***cis*-2-(*p*-Dimethylaminobenzoyl)amino-1-acenaphthenol (4)**

***dl*-4**: Obtained from *cis*-2-amino-1-acenaphthenol****** and *p*-dimethylaminobenzotriazol according to the procedure for **2a** in 70% yield. Colorless prisms (toluene-CHCl3); mp. 237 - 238 ?. 1H NMR (200 MHz) (CDCl3) δ3.00 (s, 6 H), 5.73 (t, *J* = 6.3 Hz, 1 H), 5.97 (t, *J* = 7.4 Hz, 1 H), 6.62 (d, *J* = 9.5 Hz, 2 H), 6.80 (br d, *J* = 7.9 Hz, 1 H), 7.48~7.65 (m, 4 H), 7.68~7.82 (m, 2 H), 7.74 (d, *J* = 9.5 Hz, 2 H). IR (CHCl3) 3382 3323, 3039, 2932, 1616, 1521, 1367, 1342, 1207 cm1. MS *m/z* (rel intensity) 332 (M+, 5), 314 (38), 168 (22), 148 (100). Anal. Calcd for C21H20N2O2: C, 75.88; H, 6.06; N, 8.43. Found: C, 75.68; H, 6.01; N, 8.32.

**(1*R*, 2*S*)-4 (>99% ee)**: [a]D18 = + 4.3 (*c* 1.1, CHCl3).

** A. Sudo, Y. Hashimoto, H. Kimoto,, K. Hayashi, K. Saigo, *Tetrahedron Asymmetry*, 1994, **5**, 1333.

***cis*-1-(*p*-Dimethylaminobenzoyl)aminoindan-2-ol (5)**

***dl*-5**: Obtained from *cis*-1-aminoindan-2-ol and *p*-dimethylaminobenzotriazol according to the procedure for **2a** in 93% yield. Colorless prisms (toluene); mp. 181 - 182 ?. 1H NMR (200 MHz) (CDCl3) δ2.64 (d, *J* = 5.3 Hz, 1 H), 3.02 (s, 6 H), 3.13 (ABX, *J*AB = 17.4 Hz, *J*Ax = 2.6 Hz, *J*BX= 5.3 Hz, AB = 39.5 Hz, 2 H), 4.67~4.76 (m, 1 H), 5.60 (dd, *J* = 8.9, 5.8 Hz, 1 H), 6.67 (d, *J* = 9.5 Hz, 2 H), 6.60~6.75 (br, 1H), 7.20~7.40 (m, 4 H), 7.75 (d, *J* = 9.5 Hz, 2 H). IR (CHCl3) 3444, 3008, 1638, 1608, 1368, 1340, 1220, 1210 cm1. MS *m/z* (rel intensity) 296 (M+, 25), 278 (20), 148 (100). Anal. Calcd for C18H20N2O2: C, 72.95; H, 6.80; N, 9.45. Found: C, 72.94; H, 6.82; N, 9.47.

**(1*S*, 2*R*)-5 (99% ee)**: [a]D19 =  66 (*c* 1.0, CHCl3).

***cis*-2-(*p*-Dimethylaminobenzoyl)aminocycloheptanol (6)**

***dl*-6**: Obtained from *cis*-2-aminocycloheptanol and *p*-dimethylamino-benzotriazol according to the procedure for **2a** in 67% yield. Colorless prisms *(i*Pr2O-CHCl3); mp. 144 - 145 C. 1H NMR (200 MHz) (CDCl3) δ1.40~1.95 (m, 10 H), 3.02 (s, 6 H), 4.03~4.15 (m, 1 H), 4.15~4.30 (m, 1 H), 6.48 (br d, *J* = 8.4 Hz, 1 H), 6.68 (d, J = 9.5 Hz, 2 H), 7.69 (d, J = 9.5 Hz,, 2 H). IR (CHCl3) 3440, 3000, 2935, 1635, 1608, 1498, 1210, 1202 cm1. MS *m/z* (rel intensity) 276 (M+, 15), 164 (31), 148(100). Anal. Calcd for C16H24N2O2: C, 69.53; H, 8.75; N, 10.14. Found: C, 69.31; H, 8.87; N, 10.05.

**(1*R*, 2*S*)-6 (99% ee)**: [a]D20 =  2.5 (*c* 1.0, CHCl3).

**Typical procedure for the kinetic resolution in Table 2: Preparation of (1*R*, 2*S*)-2a (entry 3)**

Isobutyric anhydride (58L, 0.35 mmol) was added to a solution of *racemic*-**2a** (131mg, 0.50 mmol), collidine (66L, 0.50 mmol) and **1** (8.6 mg, 0.025 mmol) in chloroform (3 mL) under cooling with water bath at 20 °C. After stirring for 9 h at 20 °C, the resulting solution was diluted with ethyl acetate and washed successively with 0.1 M aq HCl, saturated aq NaHCO3, and brine. The organic layer was dried over anhydrous Na2SO4, filtered, and concentrated *in vacuo*. The residue was purified by preparative TLC (SiO2, ethyl acetate:hexane=1:1) to give (1*R*, 2*S*)-**2a** (>99% ee) (36 mg, 27% recovery) and (1*S*, 2*R*)-1-isobutyroxy-2-(*p*-dimethylaminobenzoyl)-aminocyclohexane (48% ee) (100 mg, 60% yield). Enantiomeric purity was determined by HPLC analysis.

**HPLC conditions for 2a-6 and their isobutyrates:**

**2a**: Daicel Chiralpak AD, hexane:2-propanol=90:10, flow 1.0 mL/min, *t*R = 31 min (1*R*, 2*S*), 39 min (1*S*, 2*R*).

**Isobutyrate of 2a**: Daicel Chiralpak AD, hexane:2-propanol=85:15, flow 1.0 mL/min, *t*R= 30 min (1*S*, 2*R*), 40 min (1*R*, 2*S*).

**3**: Daicel Chiralpak AD, hexane:2-propanol = 90:10, flow 1.0 mL/min, *t*R = 26 min (1*R*, 2*S*), 33 min (1*S*, 2*R*).

**Isobutyrate of 3**: Daicel Chiralpak AD, hexane:2-propanol 85:15, 1.5 mL/min, *t*R = 38 min (1*R*, 2*S*), 51 min (1*S*, 2*R*).

**4**: Daicel Chiralpak AD, hexane:2-propanol = 90:10, flow 1.0 mL/min, *t*R = 28 min (1*S*, 2*R*), 35 min (1*R*, 2*S*).

**Isobutyrate of 4**: Daicel Chiralcel OD, hexane:EtOH = 85:15, flow 0.3 mL/min, *t*R = 39 min (1*S*, 2*R*), 43 min (1*R*, 2*S*).

**5** : Daicel Chiralpak AD, hexane:2-propanol = 90:10, flow 1.0 mL/min, *t*R = 36 min (1*S*, 2*R*), 40 min (1*R*, 2*S*).

**Isobutyrate of 5**: Daicel Chiralpak AD, hexane:2-propanol = 85:15, flow 1.5mL/min, *t*R = 32 min (1*S*, 2*R*), 61 min (1*R*, 2*S*).

**6**: Daicel Chiralpak AD, hexane:2-propanol = 90:10, flow 1.0 mL/min, *t*R = 36 min (1*R*, 2*S*), 44 min (1*S*, 2*R*).

**Isobutyrate of 6**: Daicel Chiralpak AD, hexane:2-propanol = 85:15, flow 1.5 mL/min, *t*R = 16 min (1*S*, 2*R*), 28 min (1*R*, 2*S*).

**Determination of the absolute configuration**:

**(1*R*, 2*S*)-2 (P=CO2CH2Ph)**: Determined by the comparison with the reported data of HPLC analysis; G. Li, H. H. Angert, K. B. Sharpless, *Angew. Chem. Int. Ed. Engl*., 1996, **35**, 2813.

**(1*R*, 2*S*)-2a**: (1*R*, 2*S*)-2-Aminocyclohexanol was obtained by catalytic hydrogenolysis (Pd/C, H2, EtOH, rt, 5 h) of (1*R*, 2*S*)-**2** (P=CO2CH2Ph), which was then treated with *p*-dimethylaminobenzotriazol according to the procedure for **2a** to give(1*R*, 2*S*)-**2a**.The absolute configuration of **2a** obtained by the kinetic resolution was determined by the comparison of the retention time of HPLC analysis with a chiral stationary phase.

**(1*R*, 2*S*)-3**: Compound **3** (97% ee) obtained by the kinetic resolution was treated with 6 M HCl under reflux for 10 h to give 2-aminocyclopentanol. The amino group of the amino alcohol was protected with Boc group (Boc2O, CH2Cl2, rt, 20 min), and the hydroxyl group was oxidized under the Swern conditions, affording (*S*)-2-(*t*-butoxycarbonylamino)cyclopentanone in 19% overall yield, [a]D19 =  (*c* 0.3, CHCl3). {*lit.** for (*S*)-2-(*t*-butoxycarbonylamino)cyclopentanone; [a]D =  (*c* 0.2, CHCl3).} The decrease in the optical purity is assumed to be the result from partial racemization under of the conditions of Swern oxidation.

* J. Aubé, M. S. Wolfe, R. K. Yantiss, S. M. Cook, F. Takusagawa, *Synth. Comm*., 1992, **22**, 3003.

**(1*R*, 2*S*)-4**: (1*R*, 2*S*)-2-amino-1-acenaphthenol was prepared according to the reported method**, which was then treated with *p*-dimethylaminobenzotriazol according to the procedure for **2a** to give(1*R*, 2*S*)-**4**.The absolute configuration of **4** obtained by the kinetic resolution was determined by the comparison of the retention time of HPLC analysis with a chiral stationary phase.

** A. Sudo, Y. Hashimoto, H. Kimoto,, K. Hayashi, K. Saigo, *Tetrahedron Asymmetry*, 1994, **5**, 1333.

**(1*S*, 2*R***)**-5**: Commercially available (1*S*, 2*R*)-1-amino-2-indanol (Aldrich Co.) was treated with *p*-dimethylaminobenzotriazol according to the procedure for **2a** to give(1*S*, 2*R*)-**5**.The absolute configuration of **5** obtained by the kinetic resolution was determined by the comparison of the retention time of HPLC analysis with a chiral stationary phase.

**(1*R*, 2*S*)-6**: Compound **6** (97% ee) obtained by the kinetic resolution was treated with 6 M HCl under reflux for 10 h to give 2-aminocycoheptanol. The amino group of the amino alcohol was protected with Boc group (Boc2O, CH2Cl2, rt, 20 min), and the hydroxyl group was oxidized under the Swern conditions, affording (*S*)-2-(*t*-butoxycarbonylamino)cycloheptanone in 44% overall yield, [a]D19 =  (*c* 0.5, CHCl3). {*lit.** for (*S*)-2-(*t*-butoxycarbonylamino)cycloheptanone; [a]D =  (*c* 0.5, CHCl3).}

* J. Aubé, M. S. Wolfe, R. K. Yantiss, S. M. Cook, F. Takusagawa, *Synth. Comm*., 1992, **22**, 3003.
